# Supplementary material
Source: HighWire-hosted journal article supplement (https://jech.bmj.com/content/71/10/974)

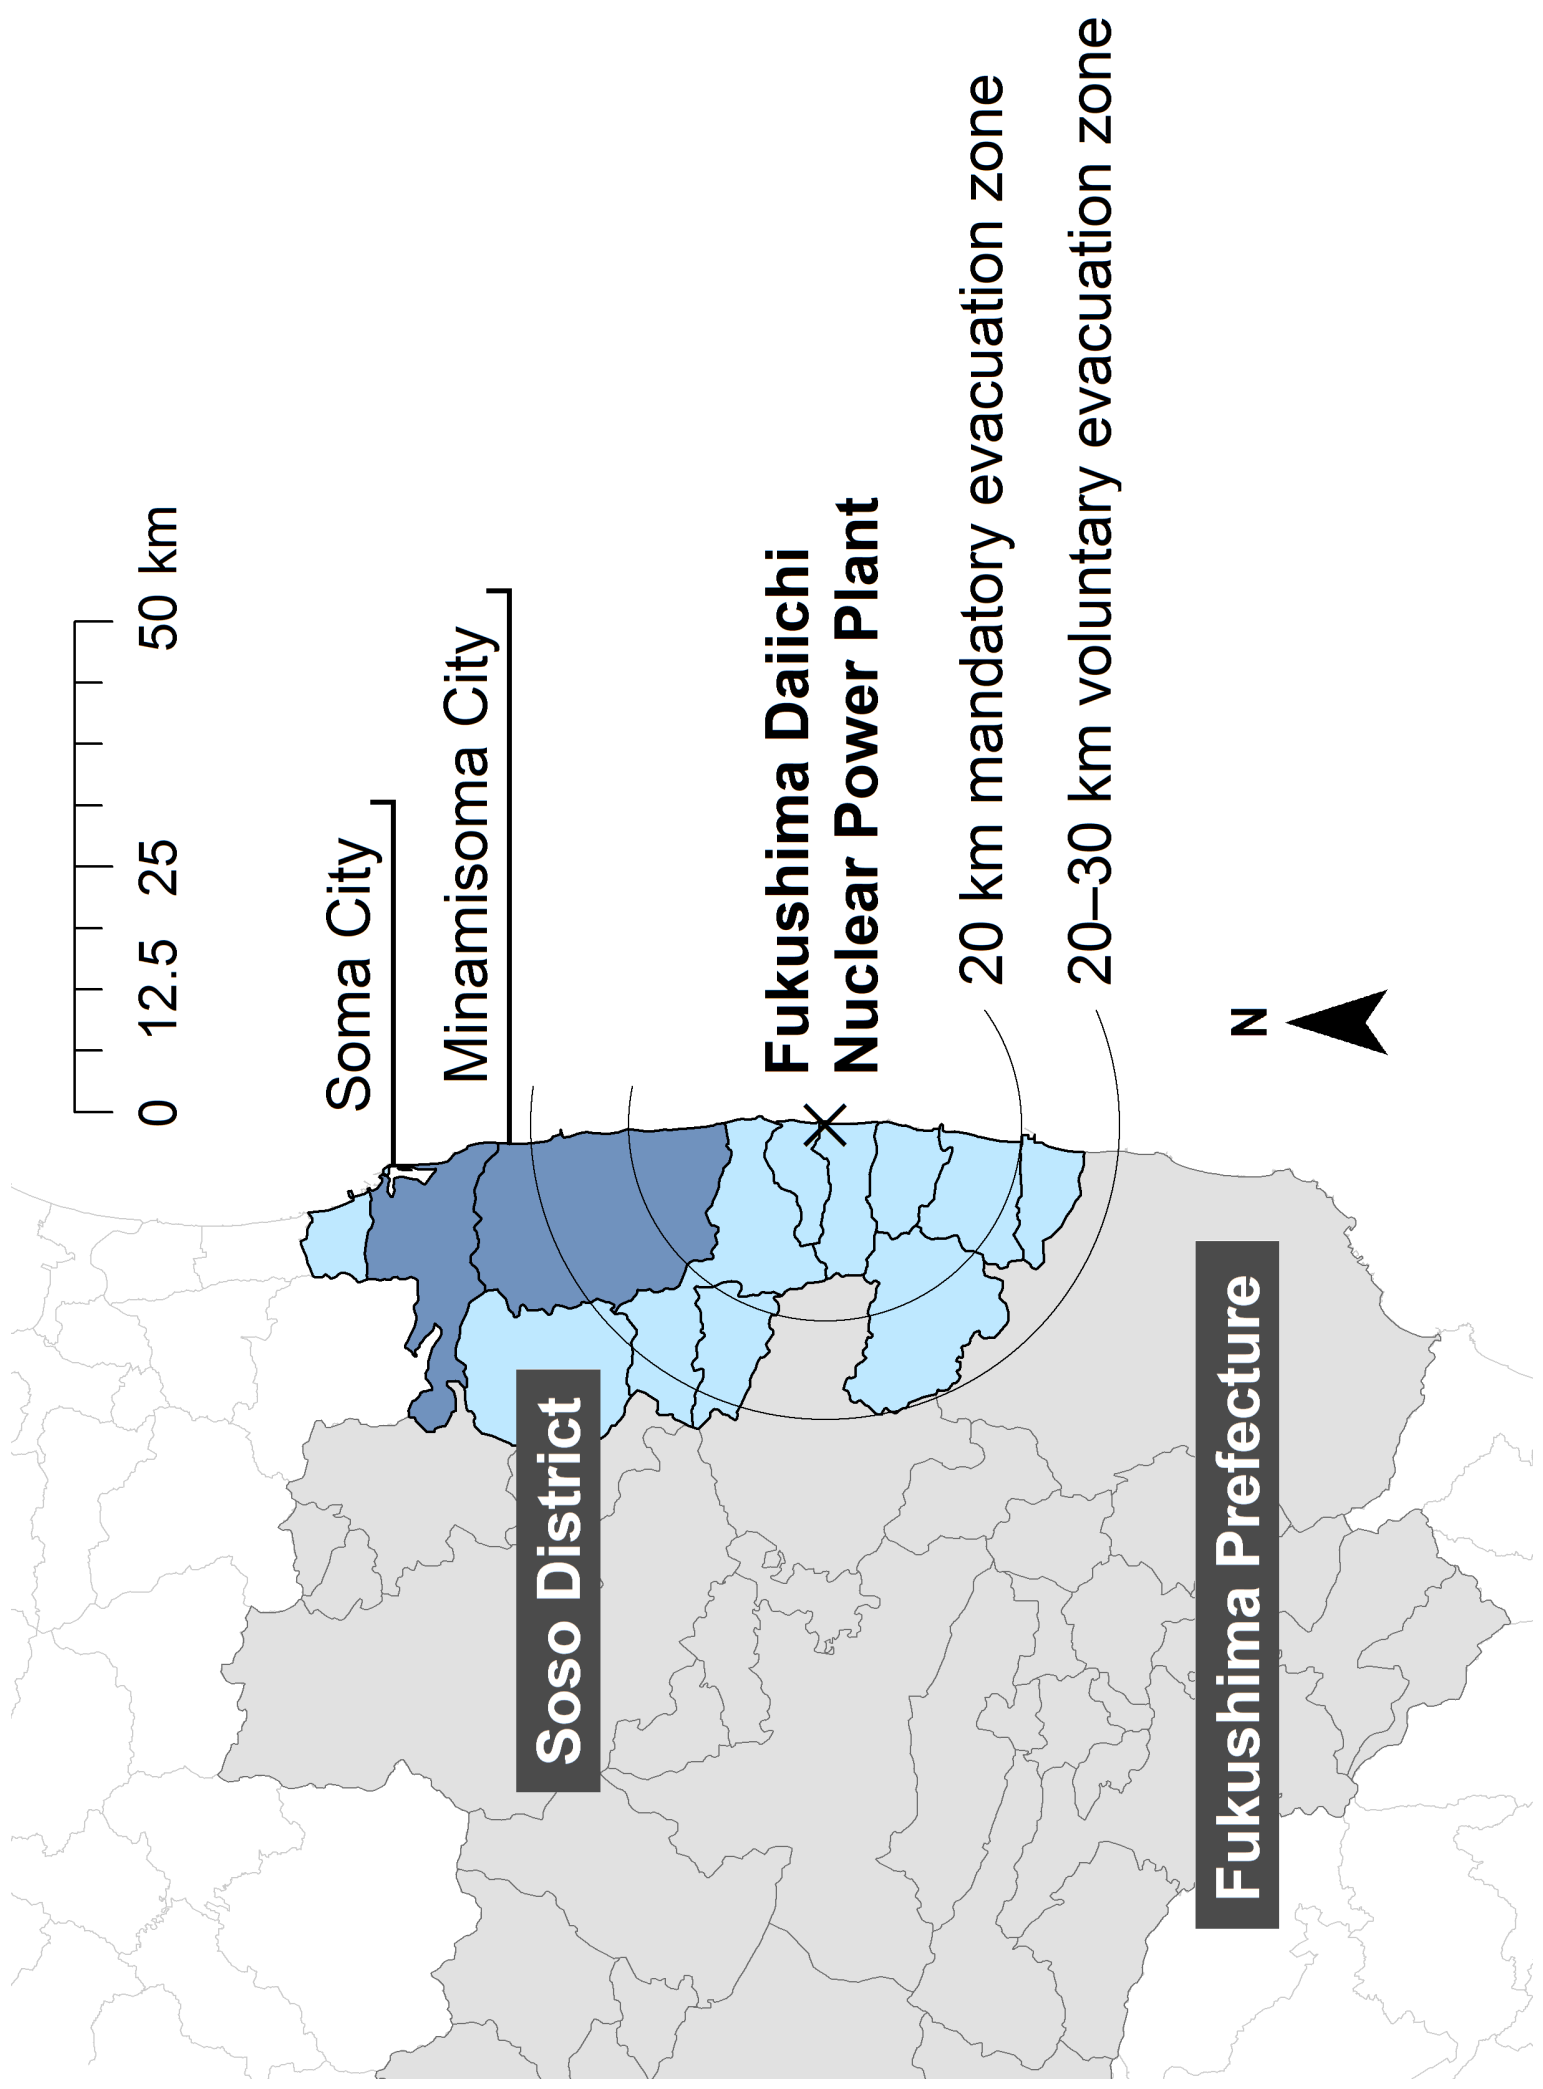

0 12.5 25 50 km

Soma City

Minamisoma City

Soso District

Fukushima Daiichi  
Nuclear Power Plant

20 km mandatory evacuation zone

20–30 km voluntary evacuation zone

Fukushima Prefecture

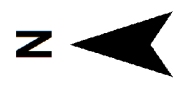

Supplement: inline-supplementary-material-1 [file inline-supplementary-material-1.pdf]
